# Supplementary material
Source: PubMed Central journal article supplement (PMC7042809)
Supplement: jamainternmed-180-653-s001.pdf [file jamainternmed-180-653-s001.pdf]

## Supplementary Online Content

Hill KA, Samuels EA, Gross CP, et al. Assessment of the prevalence of Medical student mistreatment by sex, race/ethnicity, and sexual orientation. *JAMA Intern Med*. Published online February 24, 2020. doi:10.1001/jamainternmed.2020.0030

**eFigure.** 2016 and 2017 Association of American Medical Colleges Graduation Questionnaire (AAMC GQ) Mistreatment Questions

**eTable.** Percentage of Students Reporting Each Frequency of Behavior

This supplementary material has been provided by the authors to give readers additional information about their work.

**eFigure.** 2016 and 2017 Association of American Medical Colleges Graduation Questionnaire (AAMC GQ) mistreatment questions

For each of the following behaviors please indicate the frequency you personally experienced that behavior during medical school. Include in your response any behaviors performed by faculty, nurses, residents/interns, other institution employees or staff, and other students. Please do not include behaviors performed by patients.

During medical school how frequently have you...

|                                                                                                    |       |      |              |            |
|----------------------------------------------------------------------------------------------------|-------|------|--------------|------------|
| Been publicly embarrassed?                                                                         | Never | Once | Occasionally | Frequently |
| Been publicly humiliated?                                                                          | Never | Once | Occasionally | Frequently |
| Been threatened with physical harm?                                                                | Never | Once | Occasionally | Frequently |
| Been physically harmed?                                                                            | Never | Once | Occasionally | Frequently |
| Been required to perform personal service?                                                         | Never | Once | Occasionally | Frequently |
| Been subjected to unwanted sexual advances?                                                        | Never | Once | Occasionally | Frequently |
| Been asked to exchange sexual favors for grades or other rewards?                                  | Never | Once | Occasionally | Frequently |
| Been denied opportunities for training or other rewards based on gender?                           | Never | Once | Occasionally | Frequently |
| Been subjected to sexist remarks/names?                                                            | Never | Once | Occasionally | Frequently |
| Received lower evaluations or grades solely because of gender rather than performance?             | Never | Once | Occasionally | Frequently |
| Been denied opportunities for training or other rewards based on sexual orientation?               | Never | Once | Occasionally | Frequently |
| Been subjected to offensive remarks/names related to sexual orientation?                           | Never | Once | Occasionally | Frequently |
| Received lower evaluations or grades solely because of sexual orientation rather than performance? | Never | Once | Occasionally | Frequently |
| Been denied opportunities for training or other rewards based on race/ethnicity?                   | Never | Once | Occasionally | Frequently |
| Been subjected to racially or ethnically offensive remarks/names?                                  | Never | Once | Occasionally | Frequently |
| Received lower evaluations or grades solely because of race/ethnicity rather than performance?     | Never | Once | Occasionally | Frequently |
| Been subjected to negative or offensive behaviors not described above?                             | Never | Once | Occasionally | Frequently |

**eTable.** Percentage of students reporting each frequency of behavior

|                                                             | Male | Female | White | Asian | URM  | Multiracial | Heterosexual | LGB  |
|-------------------------------------------------------------|------|--------|-------|-------|------|-------------|--------------|------|
| Publicly embarrassed                                        |      |        |       |       |      |             |              |      |
| Never                                                       | 62.2 | 53.2   | 57.4  | 60.3  | 57.7 | 55.8        | 58.4         | 49.1 |
| Once                                                        | 17.8 | 23.7   | 20.0  | 21.5  | 23.1 | 20.8        | 20.6         | 21.8 |
| Occasionally                                                | 19.1 | 22.1   | 21.8  | 17.3  | 17.8 | 22.2        | 20.1         | 26.9 |
| Frequently                                                  | 0.9  | 0.9    | 0.8   | 0.9   | 1.4  | 1.2         | 0.8          | 2.2  |
| Publicly humiliated                                         |      |        |       |       |      |             |              |      |
| Never                                                       | 80.5 | 77.1   | 80.4  | 77.6  | 75.4 | 75.9        | 79.3         | 72.9 |
| Once                                                        | 11.1 | 14.2   | 11.6  | 13.7  | 14.5 | 14.3        | 12.4         | 14.4 |
| Occasionally                                                | 7.9  | 8.2    | 7.6   | 8.3   | 9.0  | 9.1         | 7.8          | 11.3 |
| Frequently                                                  | 0.6  | 0.4    | 0.4   | 0.5   | 1.1  | 0.7         | 0.4          | 1.3  |
| Threatened with physical harm                               |      |        |       |       |      |             |              |      |
| Never                                                       | 98.3 | 99.0   | 98.8  | 98.3  | 98.8 | 98.0        | 98.7         | 97.9 |
| Once                                                        | 1.2  | 0.8    | 0.9   | 1.0   | 0.9  | 1.4         | 0.9          | 1.6  |
| Occasionally                                                | 0.4  | 0.1    | 0.2   | 0.5   | 0.2  | 0.5         | 0.3          | 0.3  |
| Frequently                                                  | 0.1  | 0      | 0     | 0.1   | 0.1  | 0.1         | 0.1          | 0.2  |
| Physically harmed                                           |      |        |       |       |      |             |              |      |
| Never                                                       | 98.2 | 98.3   | 98.5  | 98    | 97.5 | 97.5        | 98.3         | 97.3 |
| Once                                                        | 1.4  | 1.6    | 1.3   | 1.4   | 2.2  | 2.1         | 1.4          | 2.1  |
| Occasionally                                                | 0.3  | 0.2    | 0.1   | 0.4   | 0.2  | 0.4         | 0.2          | 0.3  |
| Frequently                                                  | 0.1  | 0      | 0     | 0.1   | 0    | 0           | 0            | 0.3  |
| Required to perform personal services                       |      |        |       |       |      |             |              |      |
| Never                                                       | 94.7 | 93.6   | 94.5  | 94.1  | 93.8 | 93.1        | 94.4         | 91.2 |
| Once                                                        | 3.5  | 4.4    | 3.8   | 4.1   | 3.9  | 4.4         | 3.8          | 6.0  |
| Occasionally                                                | 1.6  | 1.8    | 1.6   | 1.7   | 2.0  | 2.4         | 1.6          | 2.5  |
| Frequently                                                  | 0.2  | 0.1    | 0.1   | 0.2   | 0.3  | 0.2         | 0.1          | 0.3  |
| Subjected to unwanted sexual advances                       |      |        |       |       |      |             |              |      |
| Never                                                       | 98.7 | 93.2   | 96.0  | 96.8  | 96.5 | 94.2        | 96.3         | 92.3 |
| Once                                                        | 0.8  | 4.4    | 2.6   | 2.0   | 2.1  | 3.5         | 2.4          | 4.5  |
| Occasionally                                                | 0.4  | 2.2    | 1.3   | 1.0   | 1.2  | 2.2         | 1.2          | 2.9  |
| Frequently                                                  | 0.1  | 0.2    | 0.1   | 0.2   | 0.2  | 0           | 0.1          | 0.3  |
| Asked to exchange sexual favors for grades or other rewards |      |        |       |       |      |             |              |      |

|                                                                                       |      |      |      |      |      |      |      |      |
|---------------------------------------------------------------------------------------|------|------|------|------|------|------|------|------|
| Never                                                                                 | 99.7 | 99.8 | 99.8 | 99.6 | 99.8 | 99.8 | 99.8 | 99.5 |
| Once                                                                                  | 0.1  | 0.2  | 0.1  | 0.2  | 0    | 0.1  | 0.1  | 0.3  |
| Occasionally                                                                          | 0.1  | 0.1  | 0.1  | 0.2  | 0.1  | 0.1  | 0.1  | 0    |
| Frequently                                                                            | 0.1  | 0    | 0    | 0.1  | 0    | 0    | 0    | 0.2  |
| Subjected to negative or offensive behavior(s) not described above                    |      |      |      |      |      |      |      |      |
| Never                                                                                 | 95.3 | 93.3 | 92.5 | 92.9 | 90.6 | 90.7 | 92.7 | 85.9 |
| Once                                                                                  | 1.9  | 3.6  | 3.8  | 3.6  | 4.6  | 4.3  | 3.7  | 6.4  |
| Occasionally                                                                          | 2.4  | 2.8  | 3.2  | 2.9  | 3.7  | 4.0  | 3.0  | 6.5  |
| Frequently                                                                            | 0.4  | 0.3  | 0.4  | 0.6  | 1.1  | 1.0  | 0.5  | 1.3  |
| Denied opportunities for training or rewards based on gender                          |      |      |      |      |      |      |      |      |
| Never                                                                                 | 95.3 | 93.3 |      |      |      |      |      |      |
| Once                                                                                  | 1.9  | 3.6  |      |      |      |      |      |      |
| Occasionally                                                                          | 2.4  | 2.8  |      |      |      |      |      |      |
| Frequently                                                                            | 0.4  | 0.3  |      |      |      |      |      |      |
| Subjected to sexist remarks/names                                                     |      |      |      |      |      |      |      |      |
| Never                                                                                 | 96.6 | 75.7 |      |      |      |      |      |      |
| Once                                                                                  | 1.6  | 11.9 |      |      |      |      |      |      |
| Occasionally                                                                          | 1.6  | 11.6 |      |      |      |      |      |      |
| Frequently                                                                            | 0.2  | 0.9  |      |      |      |      |      |      |
| Received lower evaluations or grades solely because of gender rather than performance |      |      |      |      |      |      |      |      |
| Never                                                                                 | 95.4 | 93.2 |      |      |      |      |      |      |
| Once                                                                                  | 3.1  | 4.5  |      |      |      |      |      |      |
| Occasionally                                                                          | 1.2  | 2.0  |      |      |      |      |      |      |
| Frequently                                                                            | 0.3  | 0.3  |      |      |      |      |      |      |
| Denied opportunities for training or rewards based on race or ethnicity               |      |      |      |      |      |      |      |      |
| Never                                                                                 |      |      | 98.5 | 95.6 | 92.7 | 96.4 |      |      |
| Once                                                                                  |      |      | 0.4  | 1.7  | 3.0  | 1.5  |      |      |
| Occasionally                                                                          |      |      | 0.8  | 2.2  | 3.0  | 1.6  |      |      |

|                                                                                                   |  |  |      |      |      |      |      |      |
|---------------------------------------------------------------------------------------------------|--|--|------|------|------|------|------|------|
| Frequently                                                                                        |  |  | 0.3  | 0.5  | 1.2  | 0.5  |      |      |
| Subjected to racially or ethnically offensive remarks/names                                       |  |  |      |      |      |      |      |      |
| Never                                                                                             |  |  | 97.5 | 87.1 | 81.1 | 90.4 |      |      |
| Once                                                                                              |  |  | 1.3  | 7.4  | 8.9  | 5.0  |      |      |
| Occasionally                                                                                      |  |  | 1.1  | 4.9  | 8.5  | 4.0  |      |      |
| Frequently                                                                                        |  |  | 0.2  | 0.6  | 1.5  | 0.6  |      |      |
| Received lower evaluations or grades solely because of race or ethnicity rather than performance  |  |  |      |      |      |      |      |      |
| Never                                                                                             |  |  | 99.3 | 95   | 90.4 | 96.6 |      |      |
| Once                                                                                              |  |  | 0.5  | 2.6  | 4.1  | 1.7  |      |      |
| Occasionally                                                                                      |  |  | 0.2  | 1.8  | 4.0  | 1.1  |      |      |
| Frequently                                                                                        |  |  | 0.1  | 0.5  | 1.5  | 0.6  |      |      |
| Denied opportunities for training or rewards based on sexual orientation                          |  |  |      |      |      |      |      |      |
| Never                                                                                             |  |  |      |      |      |      | 99.7 | 96.8 |
| Once                                                                                              |  |  |      |      |      |      | 0.1  | 1.2  |
| Occasionally                                                                                      |  |  |      |      |      |      | 0.2  | 1.3  |
| Frequently                                                                                        |  |  |      |      |      |      | 0.1  | 0.7  |
| Subjected to offensive remarks/names related to sexual orientation                                |  |  |      |      |      |      |      |      |
| Never                                                                                             |  |  |      |      |      |      | 99.2 | 78.2 |
| Once                                                                                              |  |  |      |      |      |      | 0.4  | 10.5 |
| Occasionally                                                                                      |  |  |      |      |      |      | 0.4  | 10.2 |
| Frequently                                                                                        |  |  |      |      |      |      | 0.1  | 1.1  |
| Received lower evaluations or grades solely because of sexual orientation rather than performance |  |  |      |      |      |      |      |      |
| Never                                                                                             |  |  |      |      |      |      | 99.7 | 96.0 |
| Once                                                                                              |  |  |      |      |      |      | 0.1  | 2.1  |

|              |  |  |  |  |  |  |     |     |
|--------------|--|--|--|--|--|--|-----|-----|
| Occasionally |  |  |  |  |  |  | 0.1 | 1.4 |
| Frequently   |  |  |  |  |  |  | 0   | 0.4 |
